# PSYCHIATRIC SERVICES

A Journal of the  
American Psychiatric  
Association

- ◆ Can Item 9 of the PHQ-9 Predict a Suicide Attempt? A Five-Year Data Analysis
- ◆ Demographic and Clinical Predictors of Hospitalization: Three Current Investigations
- ◆ Trajectories of Recovery From Serious Mental Illness: A Mixed-Methods Analysis
- ◆ Deciding to Wear a Blue Hat: Disclosing Mental Illness as a Mental Health Professional

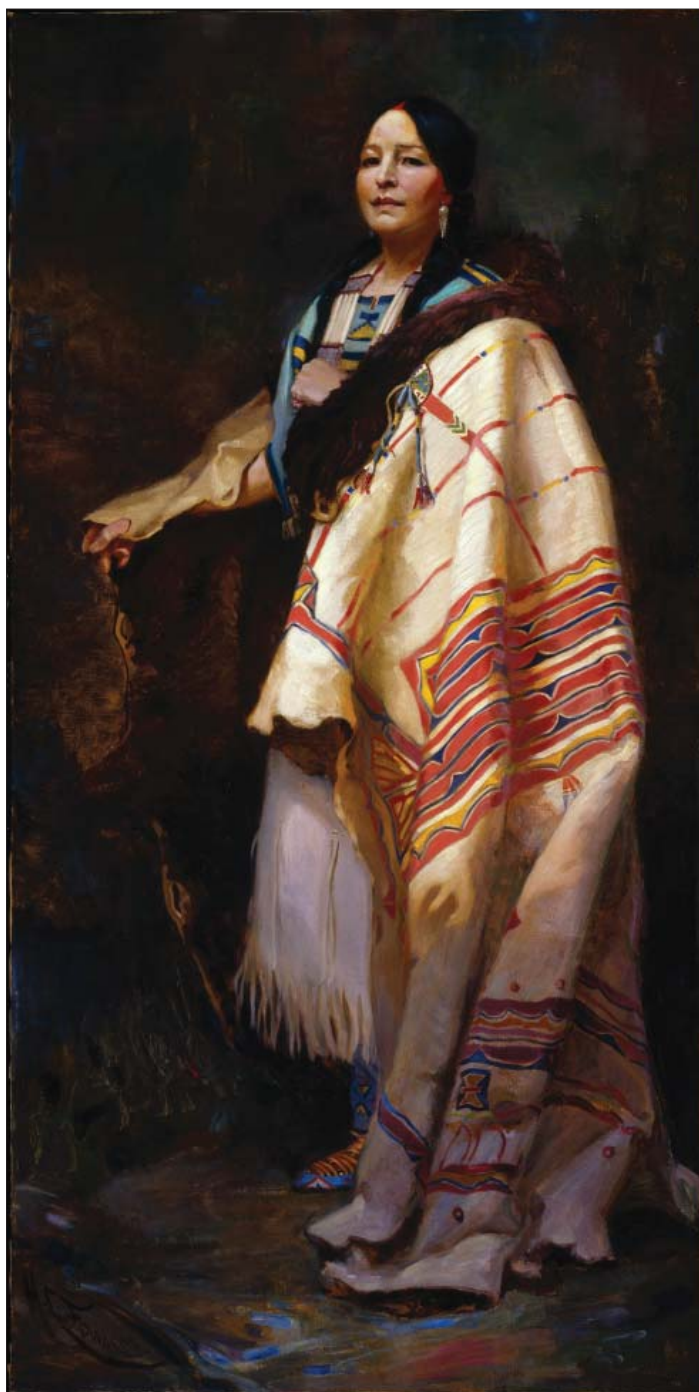

Source: http://ps.psychiatryonline.org/doi/suppl/10.1176/ps.2013.64.issue-12/suppl_file/cover.pdf
